# Supplementary material
Source: PubMed Central journal article supplement (PMC9271631)
Supplement: NIHMS1805435-supplement-2.pdf [file NIHMS1805435-supplement-2.pdf]

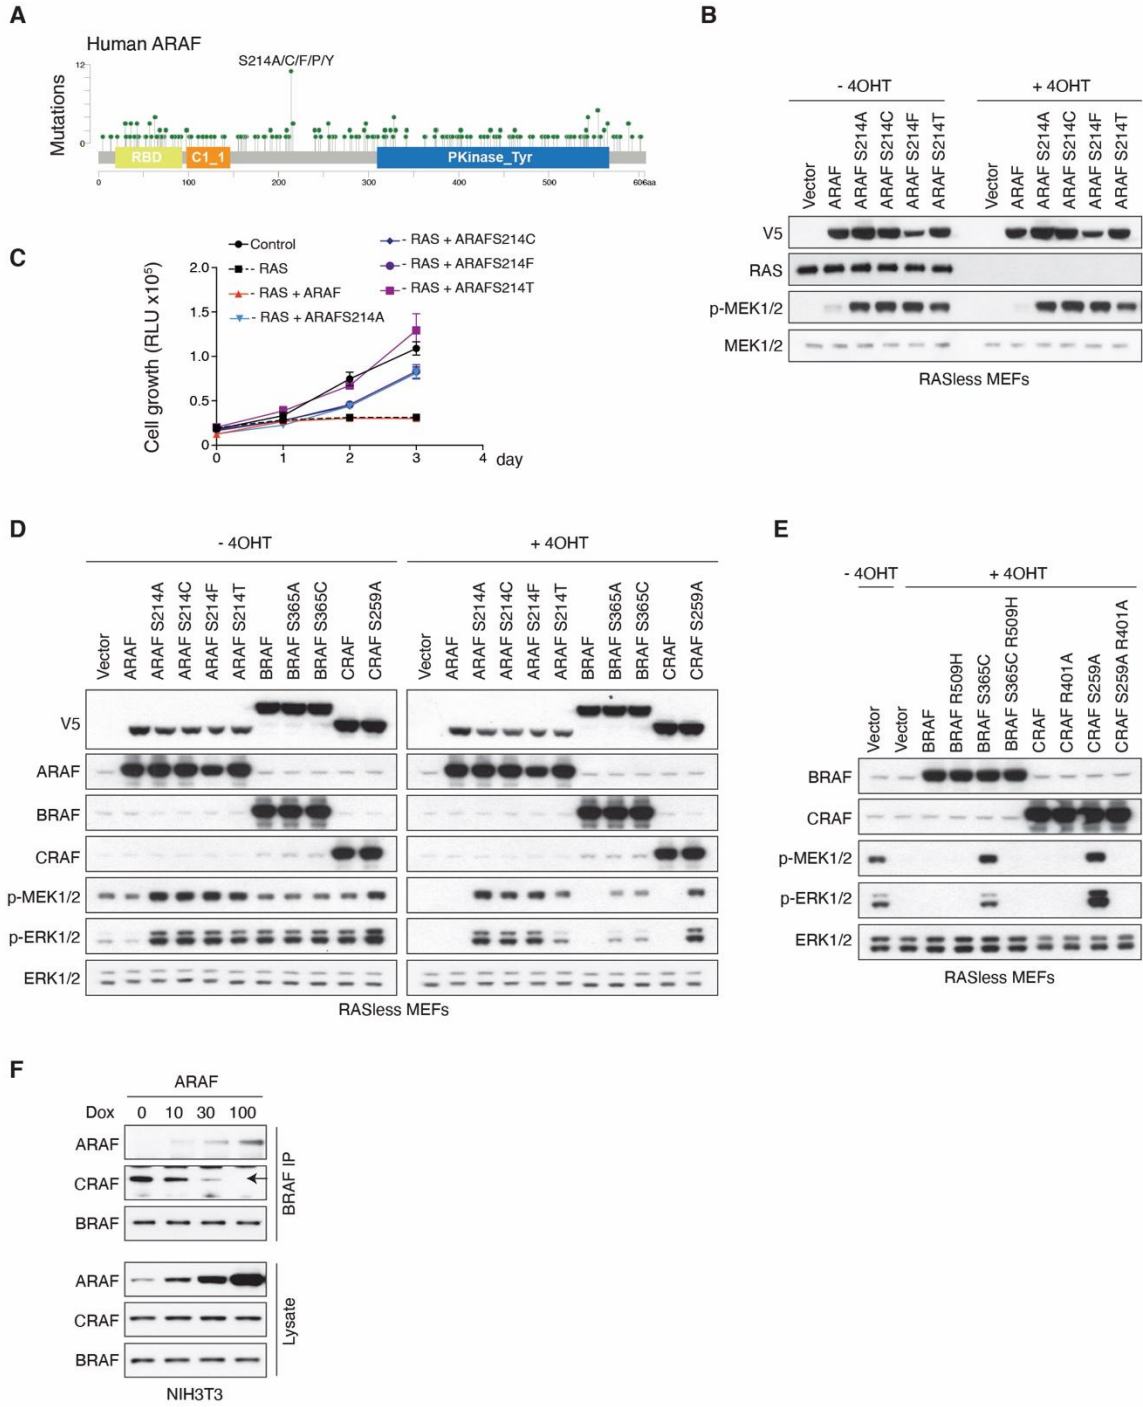

**Figure S1. ARAF S214 mutants signal as RAS-independent dimers but do not result in feedback inhibition of cellular RAS-GTP, Related to Figure 1.**

(A) Schematic representation of ARAF mutations identified in human cancers from cBioportal.

(B) K-Ras<sup>lox</sup> MEF cells stably expressing doxycycline-inducible WT ARAF or the indicated mutants were grown in medium without or with 1  $\mu$ M 4-OHT for a week to generate isogenic cells expressing or lacking K-RAS Cells. Cells were then treated with 100 ng/ml doxycycline for 48 hours. ARAF proteins were immunoprecipitated with anti-V5 agarose. The *in vitro* kinase assay was performed with kinase-dead MEK1 (K97R).

(C) K-Ras<sup>lox</sup> MEF cells stably expressing doxycycline-inducible ARAF variants were grown in medium without or with 1  $\mu$ M 4-OHT for a week. Cells were treated with 100 ng/ml doxycycline for 24 hours and then plated in 96 well plates. Cell growth rates were measured. Bars, mean $\pm$ SD triplicate of experiments.

(D and E) K-Ras<sup>lox</sup> MEF cells expressing or lacking K-RAS were transfected with indicated plasmids and harvested 24 hours after transfection. ERK pathway activity was examined by western blot.

(F) NIH3T3 cells expressing doxycycline-inducible ARAF were treated with doxycycline for 48 hours. Cells were collected and endogenous BRAF was immunoprecipitated.

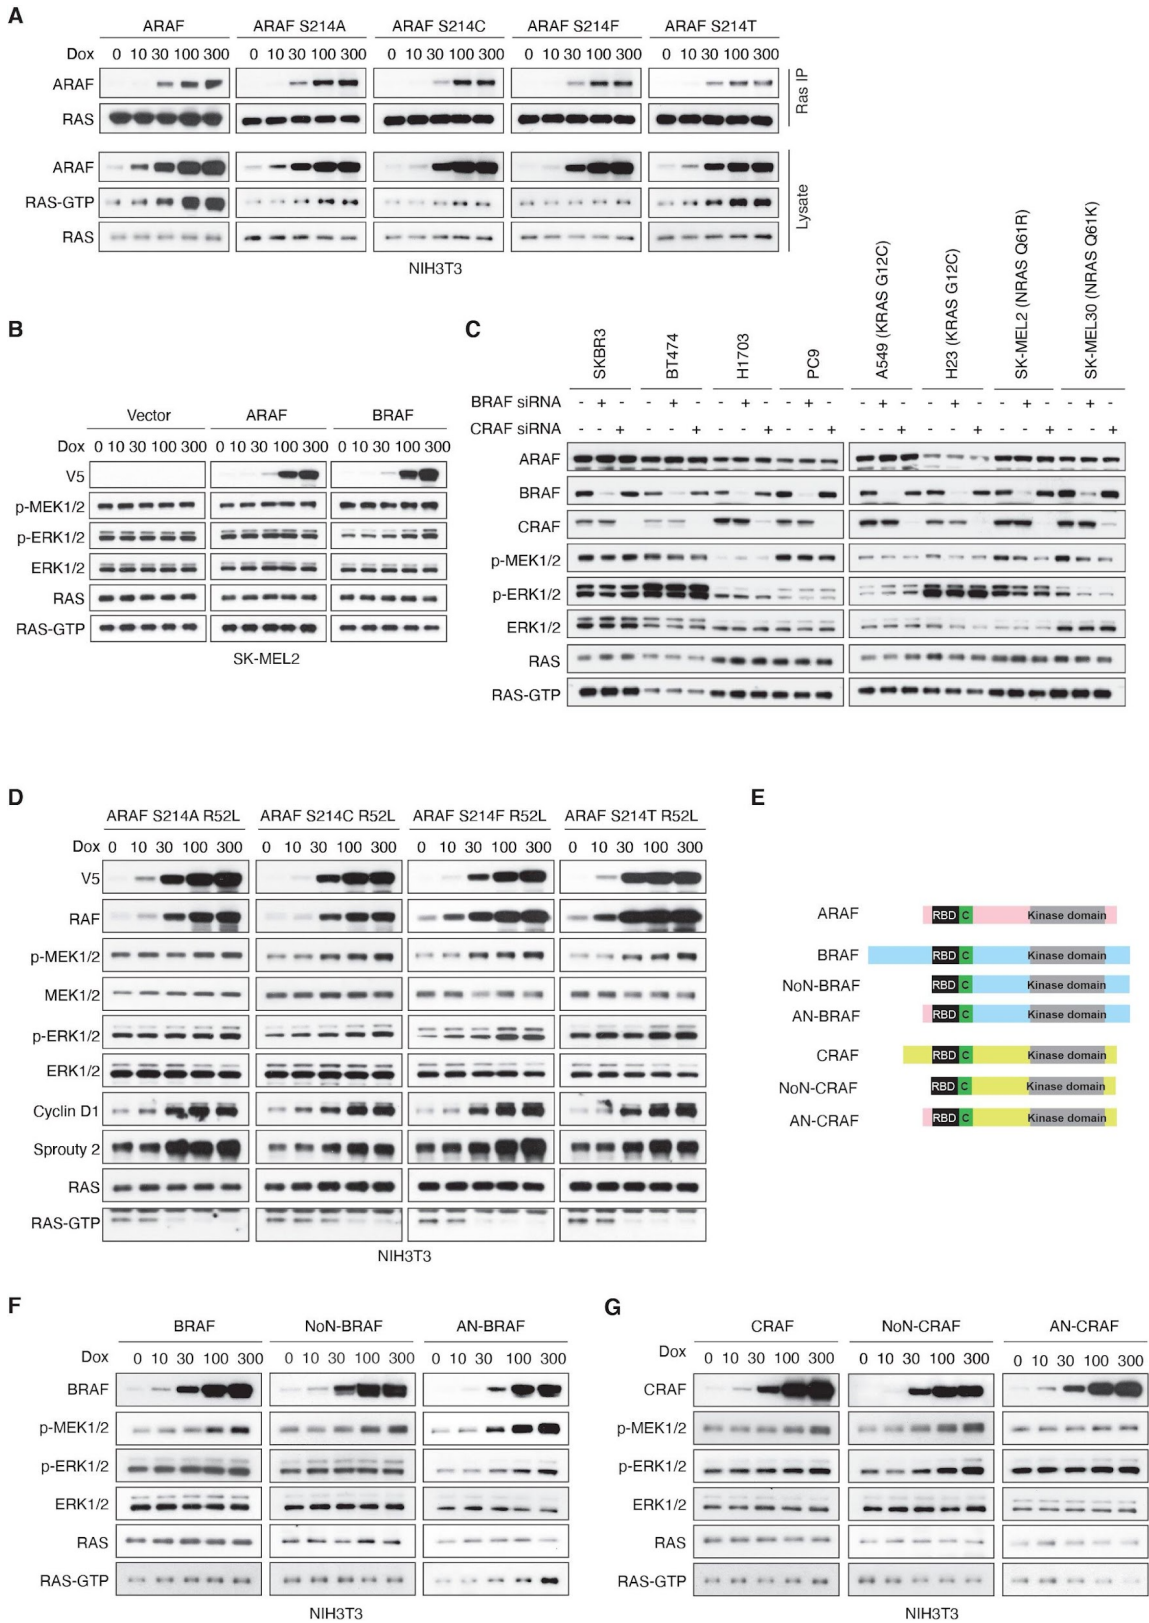

**Figure S2. ARAF increases GTP-bound WT RAS in a kinase-independent manner,  
Related to Figure 2.**

(A) NIH3T3 cells expressing doxycycline-inducible WT or mutant ARAF were treated with different doses of doxycycline for 48 hours. Cell lysates were then subjected to endogenous RAS immunoprecipitation and RAS-GTP assay.

(B) SK-MEL-2 cells expressing empty vector, doxycycline-inducible ARAF or BRAF were treated with doxycycline for 48 hours. ERK pathway activity and RAS-GTP levels were examined by western blot.

(C) SKBR3, BT474, H1703, PC9, A549, H23, SK-MEL-2 and SK-MEL30 cells were transfected with scramble, BRAF or CRAF siRNA. Cells were collected 48 hours after transfection.

(D) NIH3T3 cells expressing doxycycline-inducible ARAF mutants were treated with doxycycline for 48 hours.

(E) Schematic representation of functional domains of RAF proteins and engineered proteins with different N-terminus: NoN-BRAF, 154 amino acids of BRAF N-terminus is deleted; AN-BRAF, 154 amino acids of BRAF N-terminus is replaced by 18 amino acids from ARAF N-terminus; NoN-CRAF, 55 amino acids of CRAF N-terminus is deleted; AN-CRAF, 55 amino acids of CRAF N-terminus is replaced by 18 amino acids from ARAF N-terminus.

(F and G) NIH3T3 cells expressing doxycycline-inducible WT or engineered BRAF or CRAF were treated with doxycycline for 48 hours.



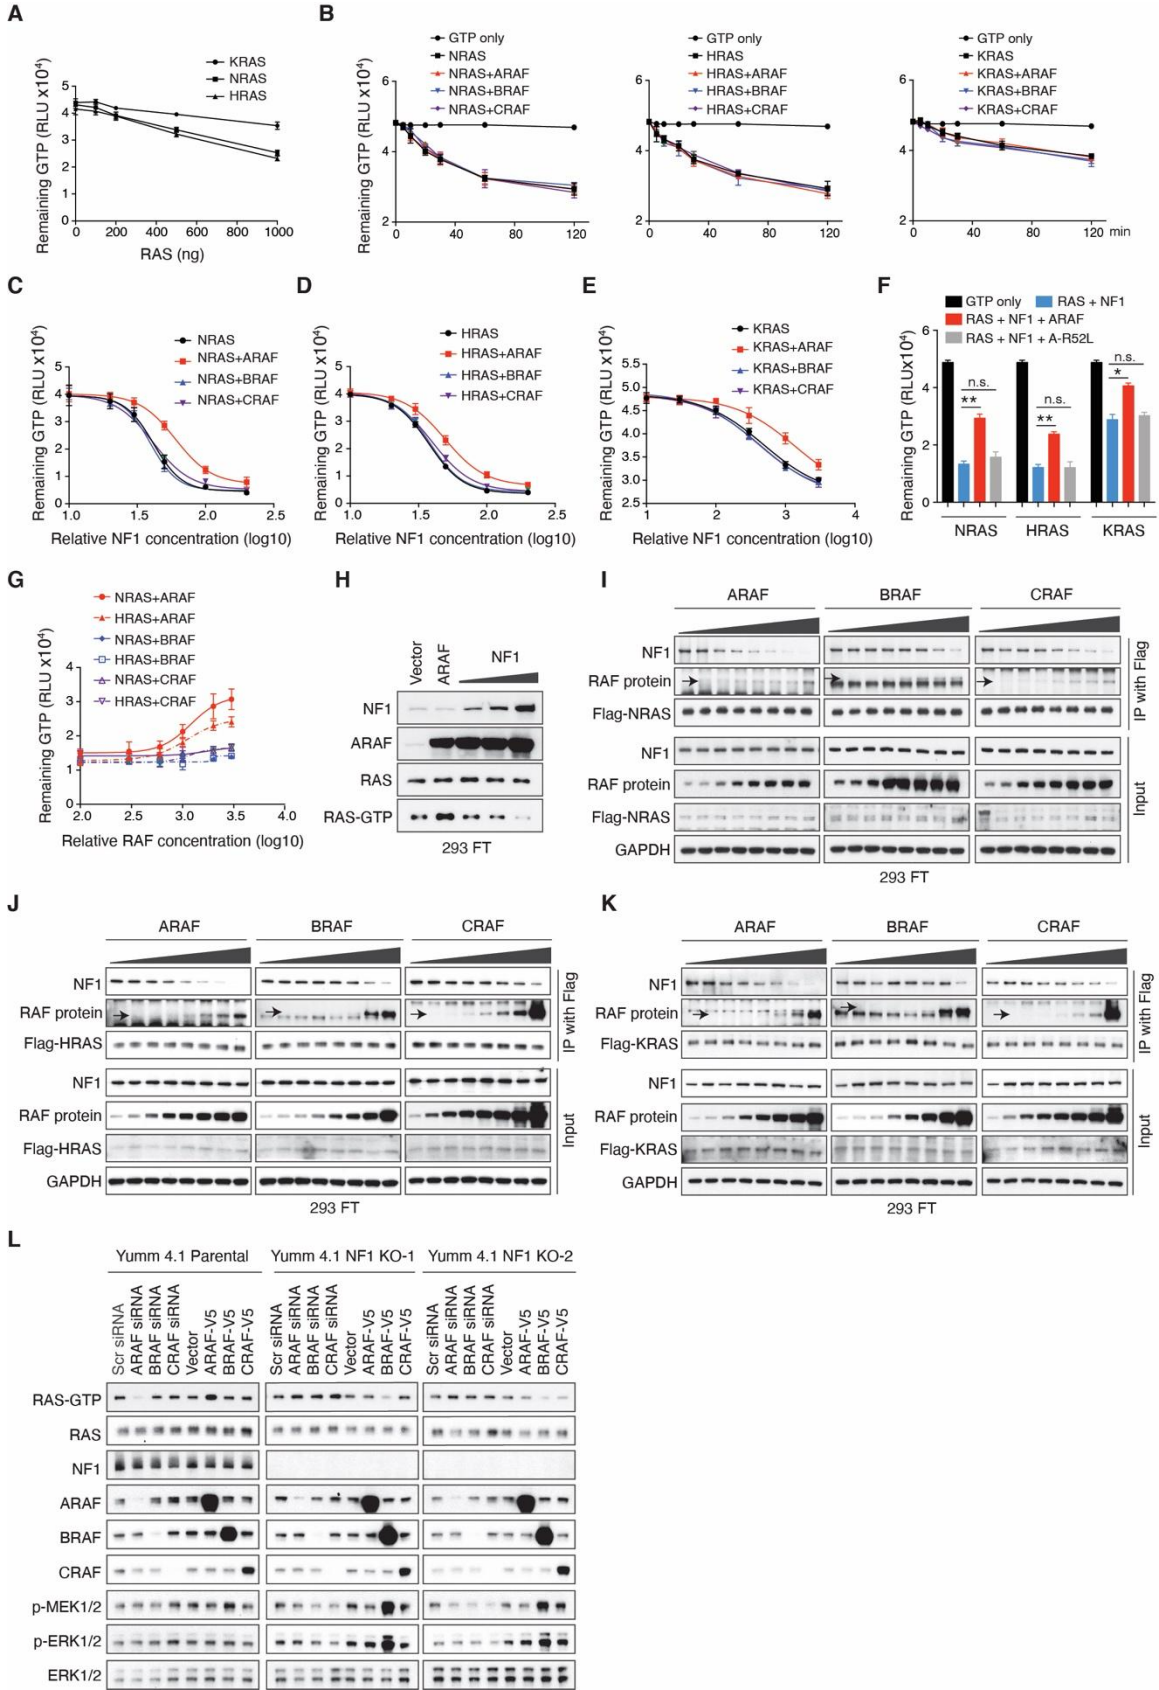

**Figure S3. ARAF increases RAS-GTP by competing with RASGAP NF1 for binding to RAS, Related to Figure 3.**

(A) GTP hydrolysis reactions were assembled with purified N-, H-, or K-RAS. Reactions were incubated for 1 hour and luminescence was recorded. Bars, mean $\pm$ SD biological triplicate of experiments.

(B) GTP hydrolysis reactions were assembled with 0.5  $\mu$ g (1  $\mu$ M) purified RAS and 2  $\mu$ g A-, B- or C-RAF proteins ( $\sim$ 1  $\mu$ M). Bars, mean $\pm$ SD biological triplicate of experiments.

(C-E) GTP hydrolysis reactions were assembled with 0.5  $\mu$ g (1  $\mu$ M) purified N- (C), H- (D), or K-RAS (E) and different amounts of NF1-333 proteins in the present of 2  $\mu$ g A-, B- or C-RAF proteins ( $\sim$ 1  $\mu$ M). Reactions were incubated for 30 minutes at room temperature. Bars, mean $\pm$ SD biological triplicate of experiments.

(F) GTP hydrolysis reactions were assembled with 0.5  $\mu$ g (1  $\mu$ M) RAS, NF1-333 (50 ng/50 nM for N- or H-RAS, 500 ng/500 nM for KRAS) and 3  $\mu$ g (1.8  $\mu$ M) WT ARAF or ARAF R52L proteins. Bars, mean $\pm$ SD biological triplicate of experiments. \*\*  $p < 0.01$ , \*  $p < 0.05$ , n.s. not significant, two-tailed Student's t test

(G) GTP hydrolysis reactions were assembled with 0.5  $\mu$ g (1  $\mu$ M) purified N- or H-RAS and 50 ng (50 nM) NF1-333 with different amounts of A-, B- or C-RAF proteins (from 60 nM to 1.8  $\mu$ M). Reactions were incubated for 30 minutes at room temperature. Bars, mean $\pm$ SD biological triplicate of experiments.

(H) 293FT cells transfected with WT ARAF and different amounts of NF1 constructs were collected 24 hours after transfection. Lysates were subjected to RAS-GTP assay.

**(I-K)** 293FT cells transfected with FLAG tagged N- (I), H- (J) or K-RAS (K), NF1 and different amounts of RAF constructs were collected 24 hours after transfection. NF1 was co-immunoprecipitated with RAS.

**(L)** Parental or NF1 knockout Yumm 4.1 cells were transfected with the indicated constructs or siRNAs. Cells were collected 48 hours after transfection.

**A**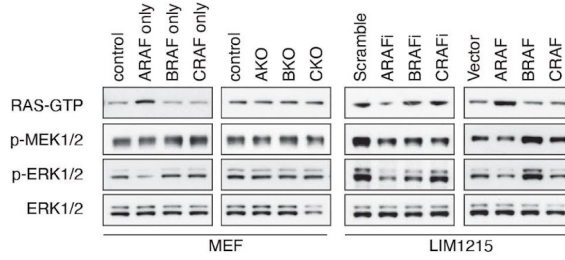**B**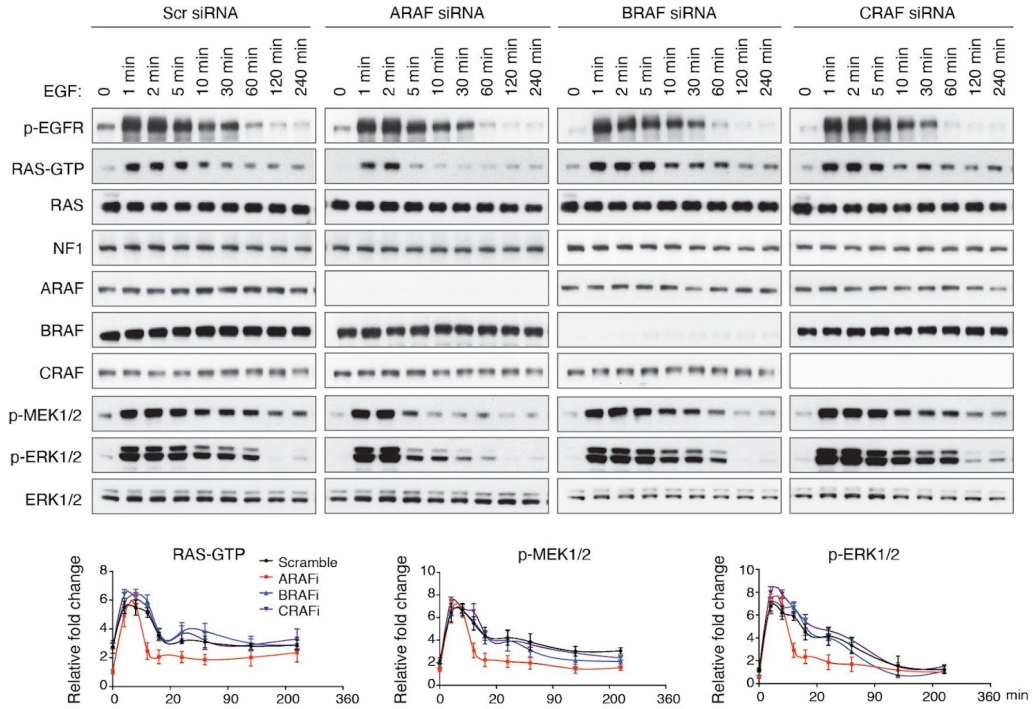**C**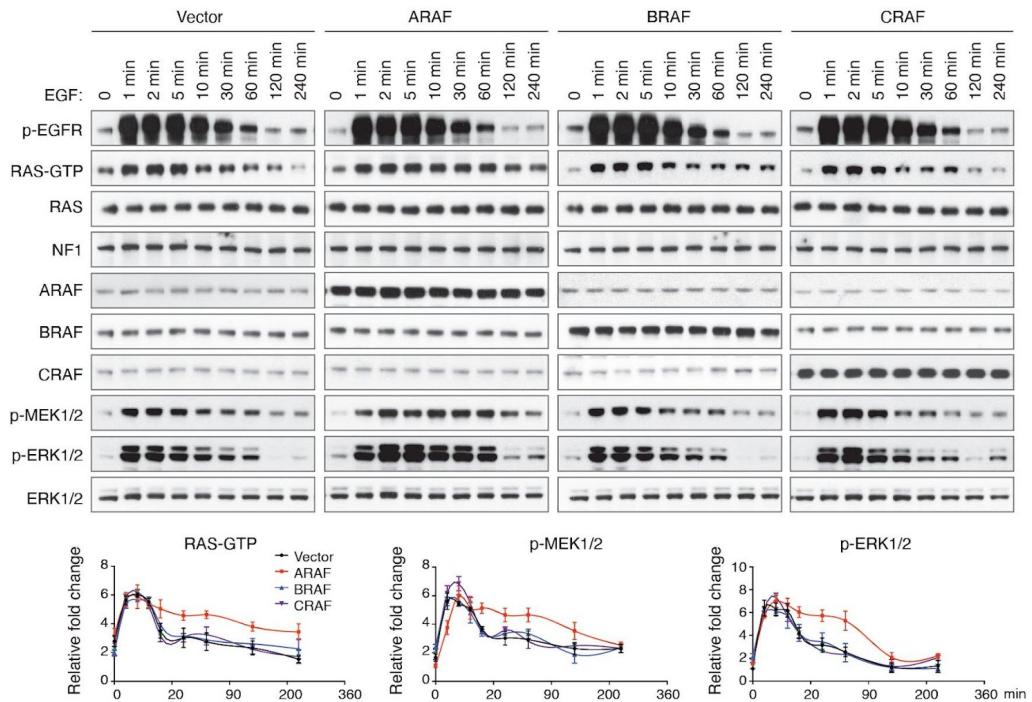

**Figure S4. The level of ARAF expression is a determinant of the duration of RAS activation in cells, Related to Figure 4.**

(A) Signaling activity of MEF cells or LIM1215 cells transfected with indicated siRNAs or constructs were shown.

(B and C) LIM1215 cells transfected with indicated siRNAs (B) or constructs (C) were treated with 100 ng/ml recombinant EGF for the indicated time points. Signaling activity and RAS-GTP levels were examined by western blot. Lower panel, RAS-GTP, p-MEK and p-ERK levels were quantified and normalized to basal levels. Bars, mean $\pm$ SD biological triplicate of experiments.

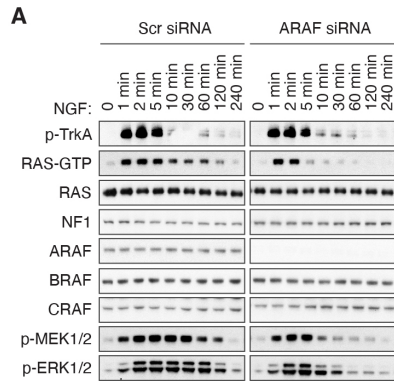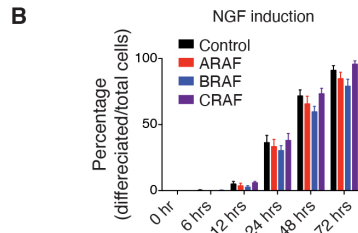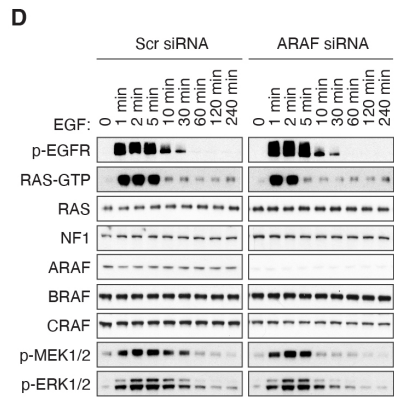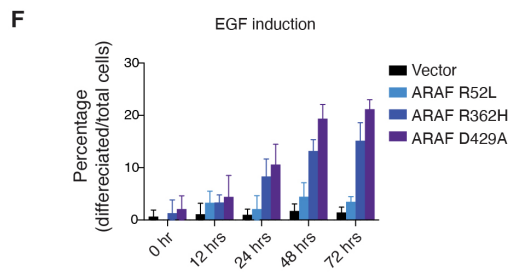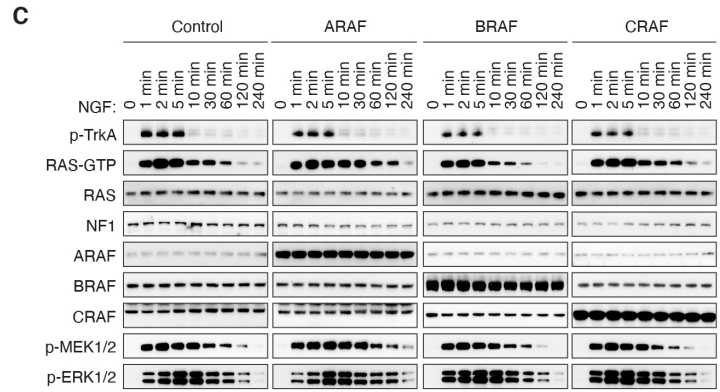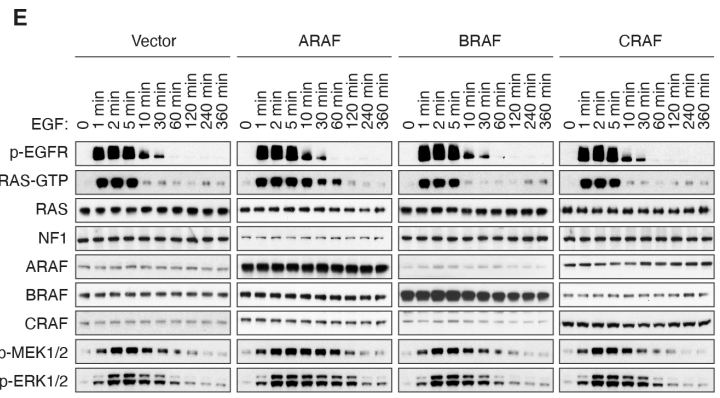

**Figure S5. Expression of ARAF influences the biological consequences of ligand activated RAS signaling, Related to Figure 5.**

(A) PC12 cells were transfected with indicated siRNAs for 48 hours and then treated with 50 ng/ml recombinant NGF for the indicated time points. ERK pathway activity and RAS-GTP levels were examined by western blot.

(B and C) PC12 cells expressing doxycycline-inducible A-, B- or C-RAF were treated with 100 ng/ml doxycycline for 24 hours. Cells were then treated with 50 ng/ml recombinant NGF. Percentage of differentiated cells was quantified at the indicated time points. Error bars, mean $\pm$ SD biological triplicate of experiments (B). ERK pathway activity and RAS-GTP levels were examined by western blot (C).

(D) PC12 cells were transfected with indicated siRNAs for 48 hours and then treated with 100 ng/ml recombinant EGF for the indicated time points.

(E) PC12 cells expressing doxycycline-inducible A-, B- or C-RAF were treated with 100 ng/ml doxycycline for 24 hours. Cells were then treated with 100 ng/ml recombinant EGF for the indicated times.

(F) PC12 cells expressing doxycycline-inducible ARAF mutants were treated with 100 ng/ml doxycycline for 24 hours. Cells were then treated with 100 ng/ml recombinant EGF. Percentage of differentiated cells was quantified at the indicated time points. Error bars, mean $\pm$ SD biological triplicate of experiments.



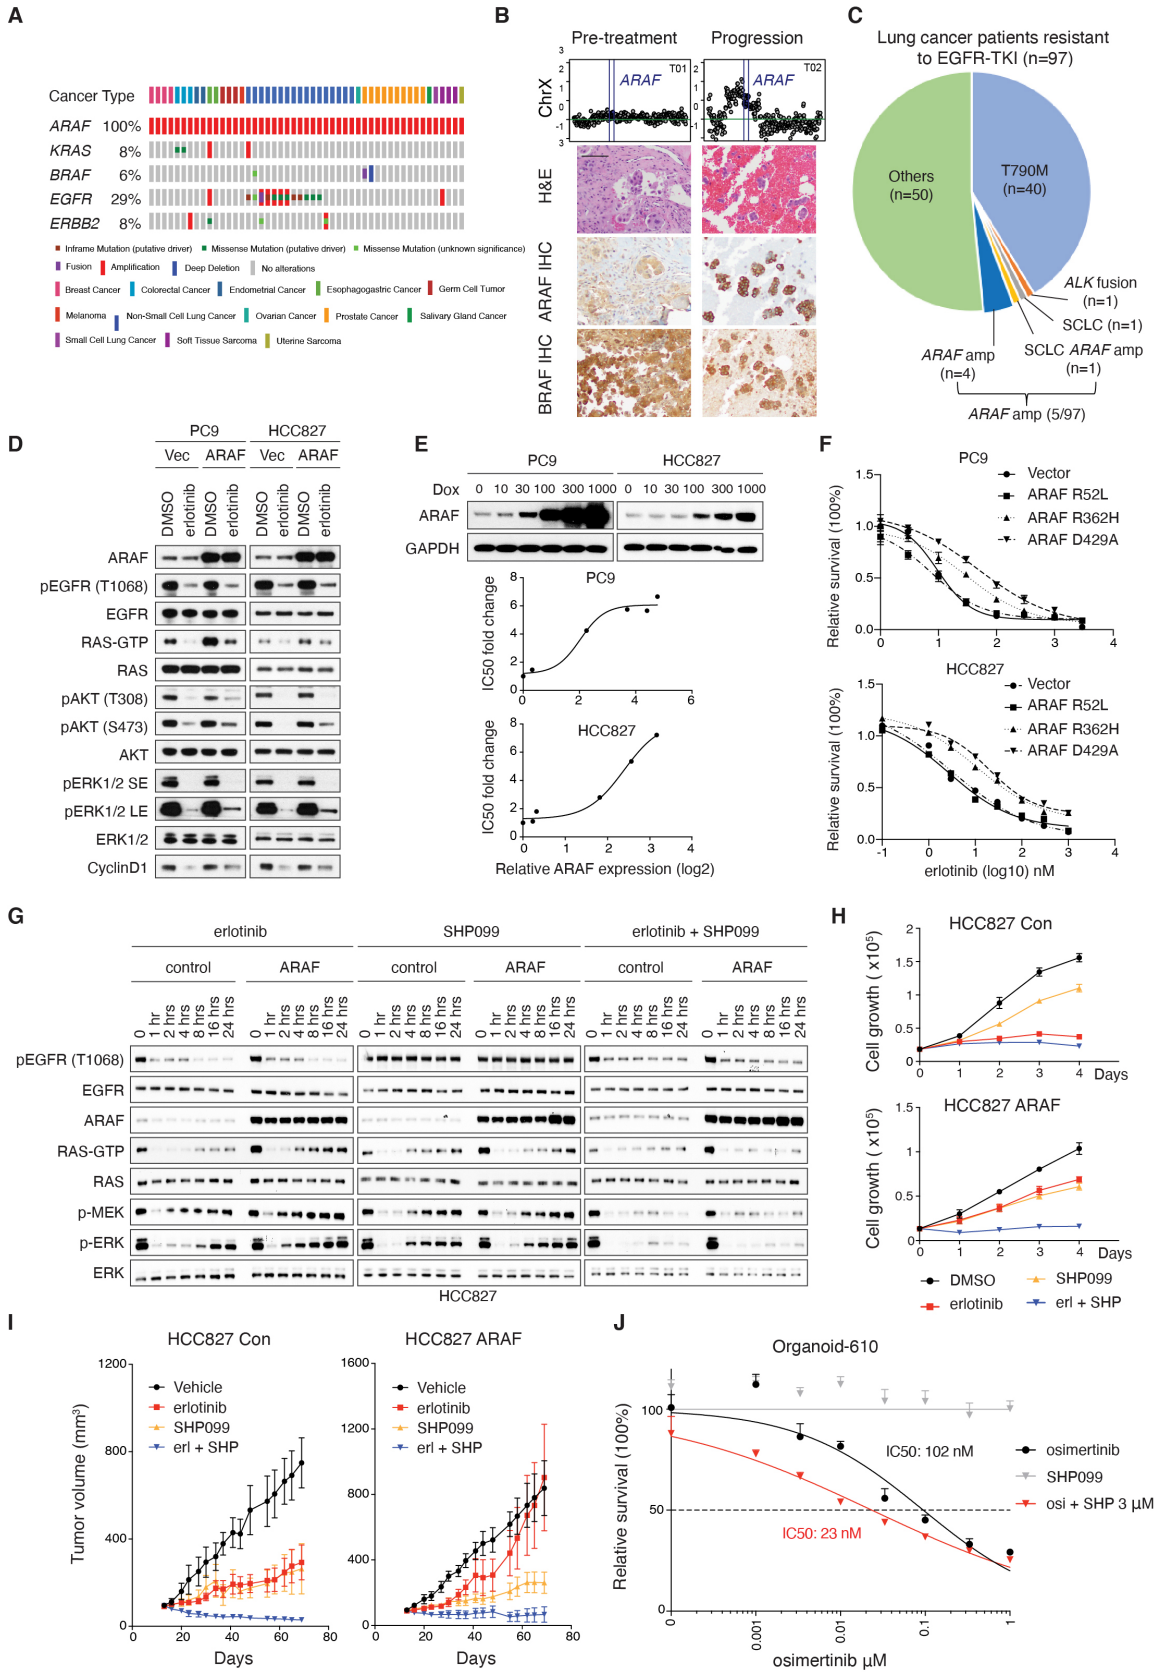

**Figure S6. ARAF overexpression causes acquired resistance of EGFR mutant lung cancers to EGFR inhibitors, Related to Figure 6.**

(A) Oncoprint showing *ARAF* amplification with concurrent genetic alterations of *KRAS*, *BRAF*, *EGFR* and *ERBB2* in patient tumors (<http://cbioportal.org>).

(B) Copy number plots for pre-treatment and progression specimen from patient 1 with probes corresponding to *ARAF*. The Y-axis indicates log<sub>2</sub> (tumor/normal) copy number (upper panel). Immunohistochemical staining of ARAF and BRAF in pre- and progression specimens (lower panel). Scale bar, 100 μm.

(C) EGFR-TKI resistant lung cancer patients with acquired *ARAF* amplification from a Japanese cohort.

(D) PC9 and HCC827 cells expressing vector or doxycycline-inducible ARAF were treated with 100ng/ml doxycycline for 24 hours. Cells were then treated with 100 nM erlotinib for 24 hours. Signaling activity and RAS-GTP levels were examined by western blot.

(E) PC9 and HCC827 cells expressing doxycycline-inducible ARAF were treated with different doses of doxycycline for 24 hours. Cells were then seeded in 96 well plates at a density of 2,000 cells/well and treated with erlotinib for 72 hours. Fold changes of erlotinib IC<sub>50</sub> were indicated upon increasing expression of ARAF.

(F) PC9 or HCC827 cells expressing vector or doxycycline-inducible ARAF mutants were seeded in 96 well plates at a density of 2,000 cells/well and supplemented with 100 ng/ml doxycycline. After 24 hours induction, cells were treated with erlotinib for 72 hours. Cell survival was normalized to untreated controls. Drug concentrations inducing 50% inhibition in survival (IC<sub>50</sub> nmol/L) are indicated. Bars, mean±SD biological triplicate of experiments.

(G) HCC827 cells expressing vector or doxycycline-inducible ARAF were treated with 100 ng/ml doxycycline for 24 hours. Cells were then treated with 100 nM erlotinib, 3  $\mu$ M SHP099 or in combination.

(H) HCC827 cells expressing vector or doxycycline-inducible ARAF were seeded in 96 well plates at a density of 2,000 cells/well and supplemented with 100 ng/ml doxycycline. Cells were then treated with 100 nM erlotinib, 3  $\mu$ M SHP099, or in combination. Bars, mean $\pm$ SD triplicate of experiments.

(I) HCC827 cells expressing doxycycline-inducible ARAF were subcutaneously injected into nude mice. Mice were fed either normal or doxycycline containing food. Erlotinib was given at 12.5 mg/kg once a day, SHP099 at 75 mg/kg once a day. Bars, mean $\pm$ SEM, n=5.

(J) Organoid-610 cells were grown in 3D culture system. Cells were treated with osimertinib, SHP099, or in combination for 72 hours. Cell survival was normalized to untreated controls. Drug concentrations inducing 50% inhibition in survival (IC<sub>50</sub> nmol/L) are indicated. Bars, mean $\pm$ SD triplicate of experiments.

**Table S1. Genetic alterations of NSCLC patient, Related to Figure 6.**

1 Metastasis (lung); 2 Metastasis (bone)

| <b>Tumors</b> | <b>Mutations</b>   | <b>Tumors</b> | <b>Gene</b>    |
|---------------|--------------------|---------------|----------------|
| 1 2           | EGFR <i>L858R</i>  | 1 2           | EGFR AMP       |
| 1 2           | YAP1 <i>F385L</i>  | 1 2           | FGFR4 AMP      |
| 1             | MAPK3 <i>R96H</i>  | 2             | ETV1 AMP       |
| 1 2           | DOT1L <i>I232N</i> | 2             | PIK3R1 DeepDel |
|               |                    | 2             | RAC1 AMP       |
|               |                    | 2             | CARD11 AMP     |
|               |                    | 2             | PDGFRB AMP     |
|               |                    | 1 2           | NPM1 AMP       |
|               |                    | 1 2           | NSD1 AMP       |
|               |                    | 2             | CSF1R AMP      |
|               |                    | 2             | PMS2 AMP       |
|               |                    | 2             | KDM6A AMP      |
|               |                    | 2             | RBM10 AMP      |
|               |                    | 2             | ARAF AMP       |

**Table S2. Genetic alterations of PDX-138, Related to Figure 6.**

| <b>Mutations</b>             | <b>Copy number alterations</b> |
|------------------------------|--------------------------------|
| <i>EGFR E746_A750del</i>     | BRCA2 DeepDel                  |
| <i>TP53 R249T</i>            | CDKN2A DeepDel                 |
| <i>ASXL2 X620_splice</i>     | FOXA1 AMP                      |
| <i>AXL N699S</i>             | NKX2-1 AMP                     |
| <i>GRIN2A D667G</i>          | LATS2 DeepDel                  |
| <i>MAP3K13 M233V</i>         | MCL1 AMP                       |
| <i>PJA2 PJA2-BRAF fusion</i> | MYC AMP                        |
|                              | RB1 DeepDel                    |
|                              | CCNE1 AMP                      |
|                              | CDKN2B DeepDel                 |
|                              | DDR2 AMP                       |
|                              | EGFR AMP                       |
|                              | ETV1 AMP                       |
|                              | FANCA DeepDel                  |
|                              | PTPRD DeepDel                  |
|                              | RAC1 AMP                       |
|                              | RICTOR AMP                     |
|                              | NTRK1 AMP                      |
|                              | TERT AMP                       |
|                              | CARD11 AMP                     |

|  |                |
|--|----------------|
|  | FOXO1 DeepDel  |
|  | ARID5B DeepDel |
|  | RECQL4 AMP     |
|  | CDK8 DeepDel   |
|  | CRLF2 DeepDel  |
|  | FLT1 DeepDel   |
|  | FLT3 DeepDel   |
|  | RIT AMP        |
|  | CD274 DeepDel  |
|  | IL7R AMP       |
|  | JAK2 DeepDel   |
|  | KDM5C AMP      |
|  | SDHA AMP       |
|  | SDHC AMP       |
|  | RET DeepDel    |
|  | HIST2H3C AMP   |
|  | HIST2H3D AMP   |
|  | PDCD1 DeepDel  |
|  | PMS2 AMP       |
|  | INHBA AMP      |
|  | IKZF1 AMP      |
|  | DIS3 DeepDel   |
|  | NFKBIA AMP     |

|  |           |
|--|-----------|
|  | BCOR AMP  |
|  | KDM6A AMP |
|  | RBM10 AMP |
|  | ARAF AMP  |
|  | GATA1 AMP |



**Table S3. Genetic alterations of organoid-610, Related to Figure 6.**

| <b>Mutations</b>  | <b>Copy number alterations</b> |
|-------------------|--------------------------------|
| EGFR <i>L858R</i> | TERT AMP                       |
| EGFR <i>T790M</i> | SLC25A13 AMP                   |
|                   | XRCC2 AMP                      |
|                   | NKX2-1 AMP                     |
|                   | ARAF AMP                       |
|                   | CDKN2A DeepDel                 |
|                   | CDKN2B DeepDel                 |
|                   | MTAP DeepDel                   |
|                   | MET Loss                       |
|                   | BRAF Loss                      |
